# Supplementary material for: A novel viologen-based coordination polymer with multi-stimuli responsive chromic properties: photochromism, thermochromism, chemochromism and electrochromism
Source: Royal Society of Chemistry journal article supplement (doi:10.1039/c9dt04699b), 2020-01-01
Supplement: c9dt04699b13.pdf [file c9dt04699b13.pdf]

## Supporting Information

### A Novel Viologen-Based Coordination Polymer with Multi-Stimulate Chromic Properties: Photochromism, Thermochromism, Chemochromism and Electrochromism

Xiao-Nan Li,<sup>a</sup> Zu-Ming Tu,<sup>b</sup> Li Li,<sup>a</sup> Zhi-Hui Wang,<sup>a</sup> Hong Zhang<sup>a\*</sup>

<sup>a</sup>Institute of Polyoxometalate Chemistry, Department of Chemistry, Northeast Normal University, Changchun, Jilin 130024, PR China.

<sup>b</sup>Department of Chemistry, Wuhan Institute of Technology, Wuhan 430000, PR China

Fax: +86-0431-85098827; Tel: +86-0431-85099372; E-mail: hope 20130122@163.com, zhangh@nenu.edu.cn

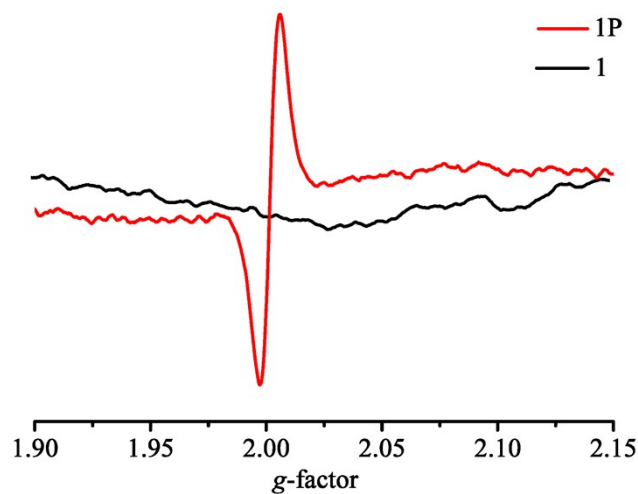

Figure S1. ESR spectra of 1 and 1p.

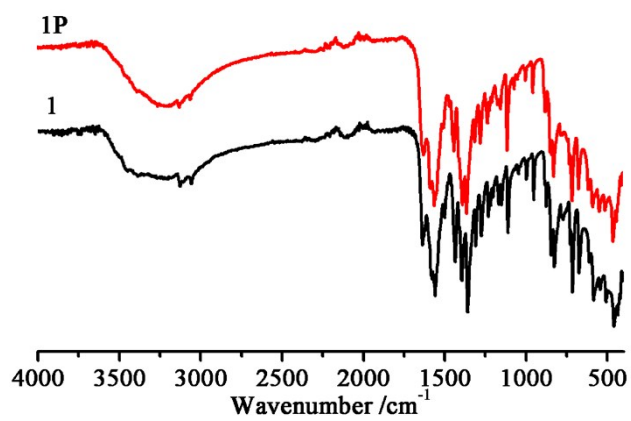

Figure S2. The IR spectra of **1** and **1p**.

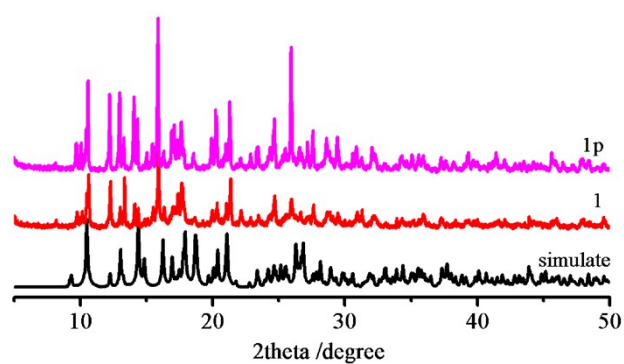

Figure S3. Simulated and experimental powder X-ray diffraction of **1** and **1p**.

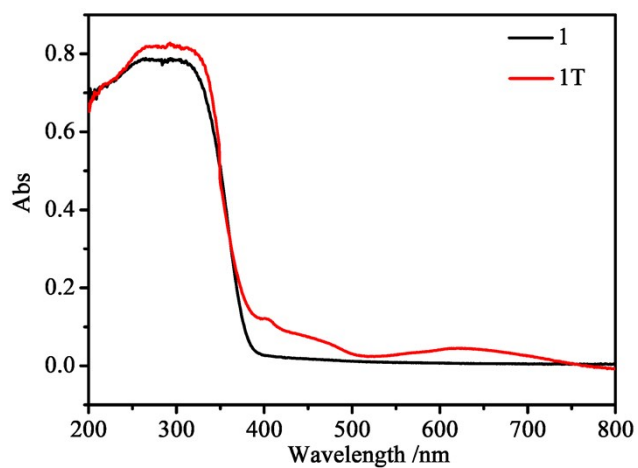

Figure S4. The UV-vis diffuse-reflectance spectra of **1** and **1T**.

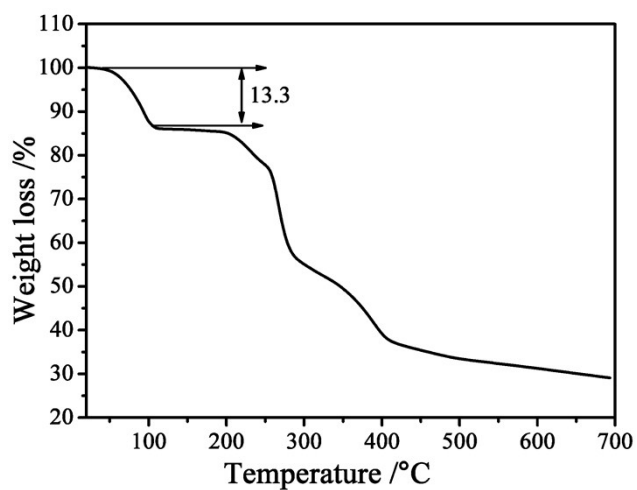

Figure S5. TG curve of 1.

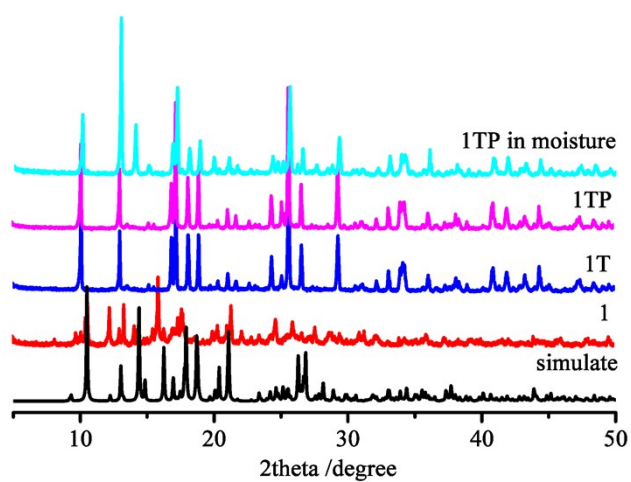

Figure S6. PXRD patterns of simulated and experimental samples of 1, 1T, 1TP, and 1TP in moisture.

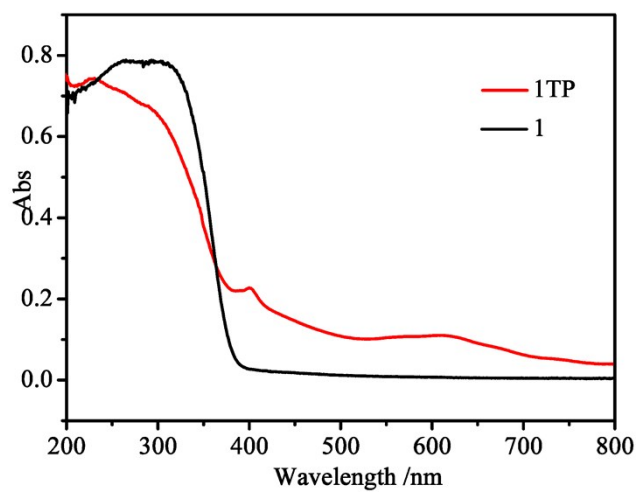

Figure S7. The UV-vis diffuse-reflectance spectra of 1 and 1TP.

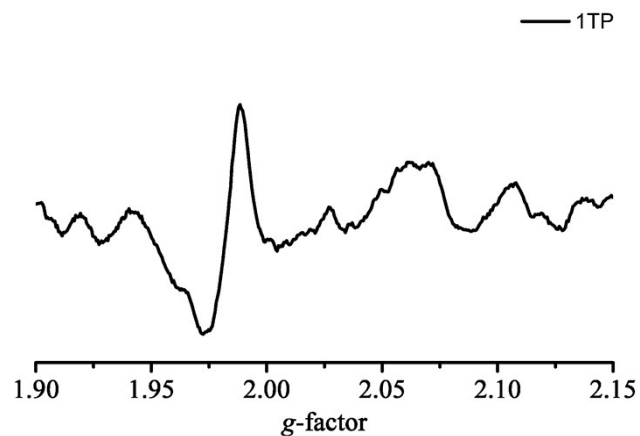

**Figure S8.** ESR spectrum of 1TP.

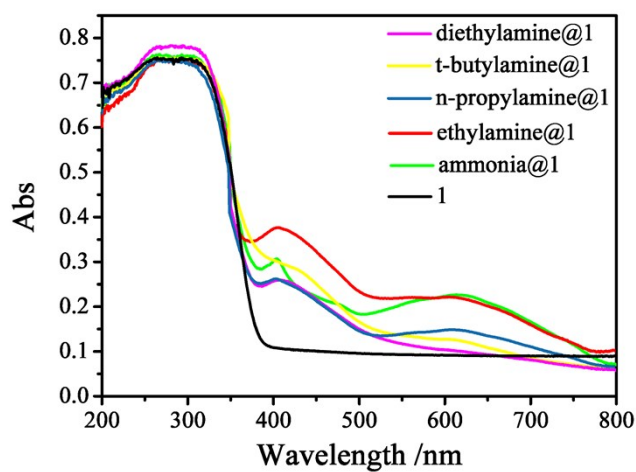

**Figure S9.** Solid state UV-vis spectra of amine@1.

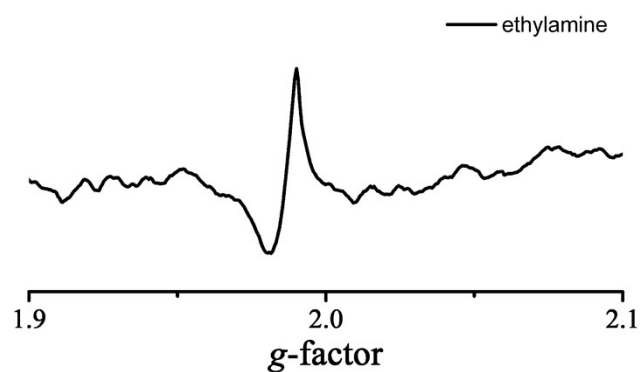

**Figure S10.** ESR spectrum of ethylamine@1 in the solid state.

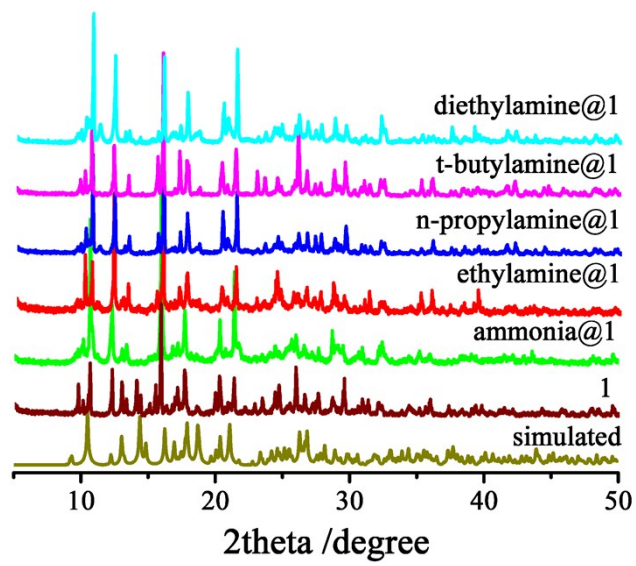

Figure S11. PXRD pattern of amine@1 compared with the simulated pattern of 1.

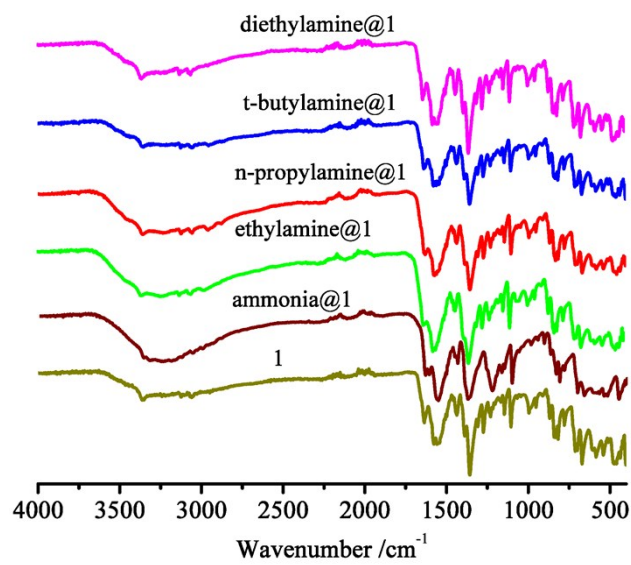

Figure S12. The FT-IR spectra of 1 and amine@1.

**Table S1. Crystal data and structure refinement of compound 1.**

|                                    |                                                                                |
|------------------------------------|--------------------------------------------------------------------------------|
| Empirical formula                  | C <sub>30</sub> H <sub>26</sub> N <sub>4</sub> O <sub>15</sub> Zn <sub>2</sub> |
| Formula weight                     | 813.29                                                                         |
| Temperature/K                      | 300.01                                                                         |
| Crystal system                     | triclinic                                                                      |
| Space group                        | <i>P</i> <sup>1</sup>                                                          |
| a/Å                                | 10.4442(6)                                                                     |
| b/Å                                | 11.2777(5)                                                                     |
| c/Å                                | 14.8434(8)                                                                     |
| α/°                                | 103.166(2)                                                                     |
| β/°                                | 107.531(2)                                                                     |
| γ/°                                | 102.434(2)                                                                     |
| Volume/Å <sup>3</sup>              | 1545.57(14)                                                                    |
| ρ <sub>calc</sub> /cm <sup>3</sup> | 1.748                                                                          |
| μ/mm <sup>1</sup>                  | 1.637                                                                          |
| F(000)                             | 828.0                                                                          |
| Goodness-of-fit on F <sup>2</sup>  | 1.109                                                                          |
| Final R indexes [I>=2σ(I)]         | R1 = 0.0329, wR2 = 0.0883                                                      |
| Final R indexes [all data]         | R1 = 0.0464, wR2 = 0.1051                                                      |

$$^aR1 = \sum ||F0| - |Fc|| / \sum |F0|. \quad ^b wR2 = [\sum w(Fo^2 - Fc^2)^2 / \sum w(Fo^2)]^{1/2}$$

**Table S2. Selected bond lengths for compound 1.**

|                     |            |         |          |
|---------------------|------------|---------|----------|
| Zn1-O1              | 2.0166(19) | N5-C31  | 1.333(4) |
| Zn1-O31             | 2.091(2)   | O12-C7  | 1.225(4) |
| Zn2-O8              | 1.985(2)   | C4-C10  | 1.392(4) |
| Zn2-N12             | 2.134(2)   | C5-C22  | 1.517(4) |
| O1-C12              | 1.273(3)   | C5-C24  | 1.394(4) |
| O2-C3               | 1.230(3)   | C7-C23  | 1.519(4) |
| O3-C6               | 1.268(3)   | C8-C20  | 1.398(4) |
| O3-Zn1 <sup>1</sup> | 2.091(2)   | C8-C9   | 1.482(4) |
| N1-Zn2 <sup>2</sup> | 2.134(2)   | C13-C24 | 1.380(4) |
| N1-C4               | 1.341(3)   | C14-C27 | 1.518(5) |
| N2-C2               | 1.344(3)   | C21-C25 | 1.377(4) |
| N2-C17              | 1.344(4)   | C23-C30 | 1.516(4) |

Symmetry transformations used to generate equivalent atoms: <sup>1</sup>1-X, 1-Y, 1-Z; <sup>2</sup>1-X, 1-Y, 2-Z.

**Table S3.** Selected angles for **1**.

|                                      |            |             |          |
|--------------------------------------|------------|-------------|----------|
| O1-Zn1-N2 <sup>1</sup>               | 102.87(9)  | C2-C5-C22   | 123.4(2) |
| O1-Zn1-O14                           | 87.49(8)   | C2-C5-C24   | 117.7(3) |
| O6-Zn1-O1                            | 94.95(9)   | C24-C5-C22  | 118.9(2) |
| N2 <sup>1</sup> -Zn1-O3 <sup>1</sup> | 78.38(8)   | O8-C7-C23   | 114.6(3) |
| O14-Zn1-N2 <sup>1</sup>              | 129.89(11) | O12-C7-C23  | 120.4(3) |
| O4-Zn2-O7                            | 90.28(8)   | C26-C8-C9   | 120.6(3) |
| O8-Zn2-O4                            | 99.44(9)   | C4-C10-C12  | 123.7(2) |
| O8-Zn2-O7                            | 96.02(10)  | C21-C10-C12 | 119.1(2) |
| C12-O1-Zn1                           | 120.61(18) | O13-C11-O6  | 124.9(3) |
| C6-O3-Zn1 <sup>1</sup>               | 115.88(18) | O13-C11-C14 | 120.3(3) |
| C22-O4-Zn2                           | 120.62(19) | O1-C12-C10  | 115.0(2) |
| C3-O5-Zn2 <sup>2</sup>               | 117.64(17) | O9-C12-O1   | 125.7(3) |
| C11-O6-Zn1                           | 122.4(2)   | O9-C12-C10  | 119.2(3) |

Symmetry transformations used to generate equivalent atoms: <sup>1</sup>1-X, 1-Y, 1-Z; <sup>2</sup>1-X, 1-Y, 2-Z.
