# Supplementary figures and images for: A novel viologen-based coordination polymer with multi-stimuli responsive chromic properties: photochromism, thermochromism, chemochromism and electrochromism
Source: Royal Society of Chemistry journal article supplement (doi:10.1039/c9dt04699b), 2020-01-01

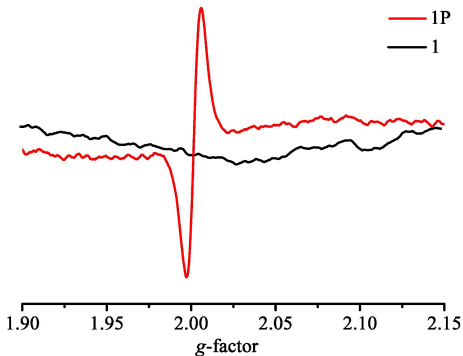

Supplement: c9dt04699b1.pdf [file c9dt04699b1.pdf]

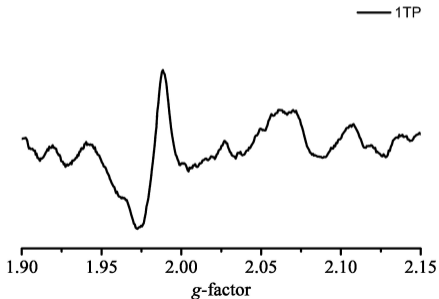

Supplement: c9dt04699b11.pdf [file c9dt04699b11.pdf]

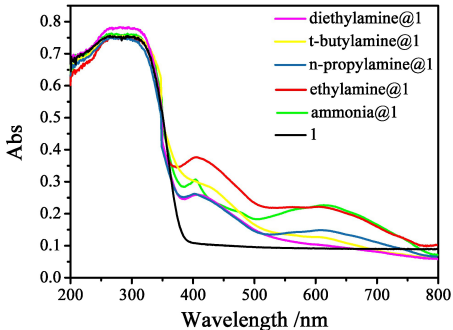

Supplement: c9dt04699b12.pdf [file c9dt04699b12.pdf]

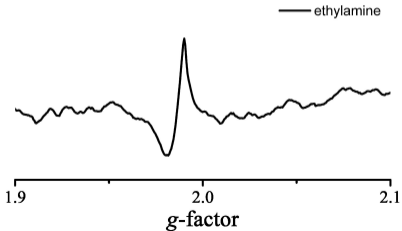

Supplement: c9dt04699b2.pdf [file c9dt04699b2.pdf]

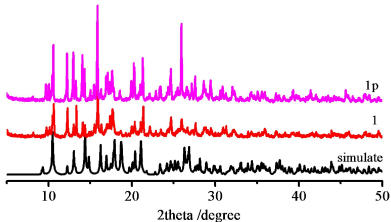

Supplement: c9dt04699b6.pdf [file c9dt04699b6.pdf]
